# Supplementary material for: A phylogeny-based sampling strategy and power calculator informs genome-wide associations study design for microbial pathogens
Source: PubMed Central journal article supplement (PMC4256898; doi:10.1186/s13073-014-0101-7), 2014-11-15

# Locus Level Power by effect size (f\_locus)

s=300

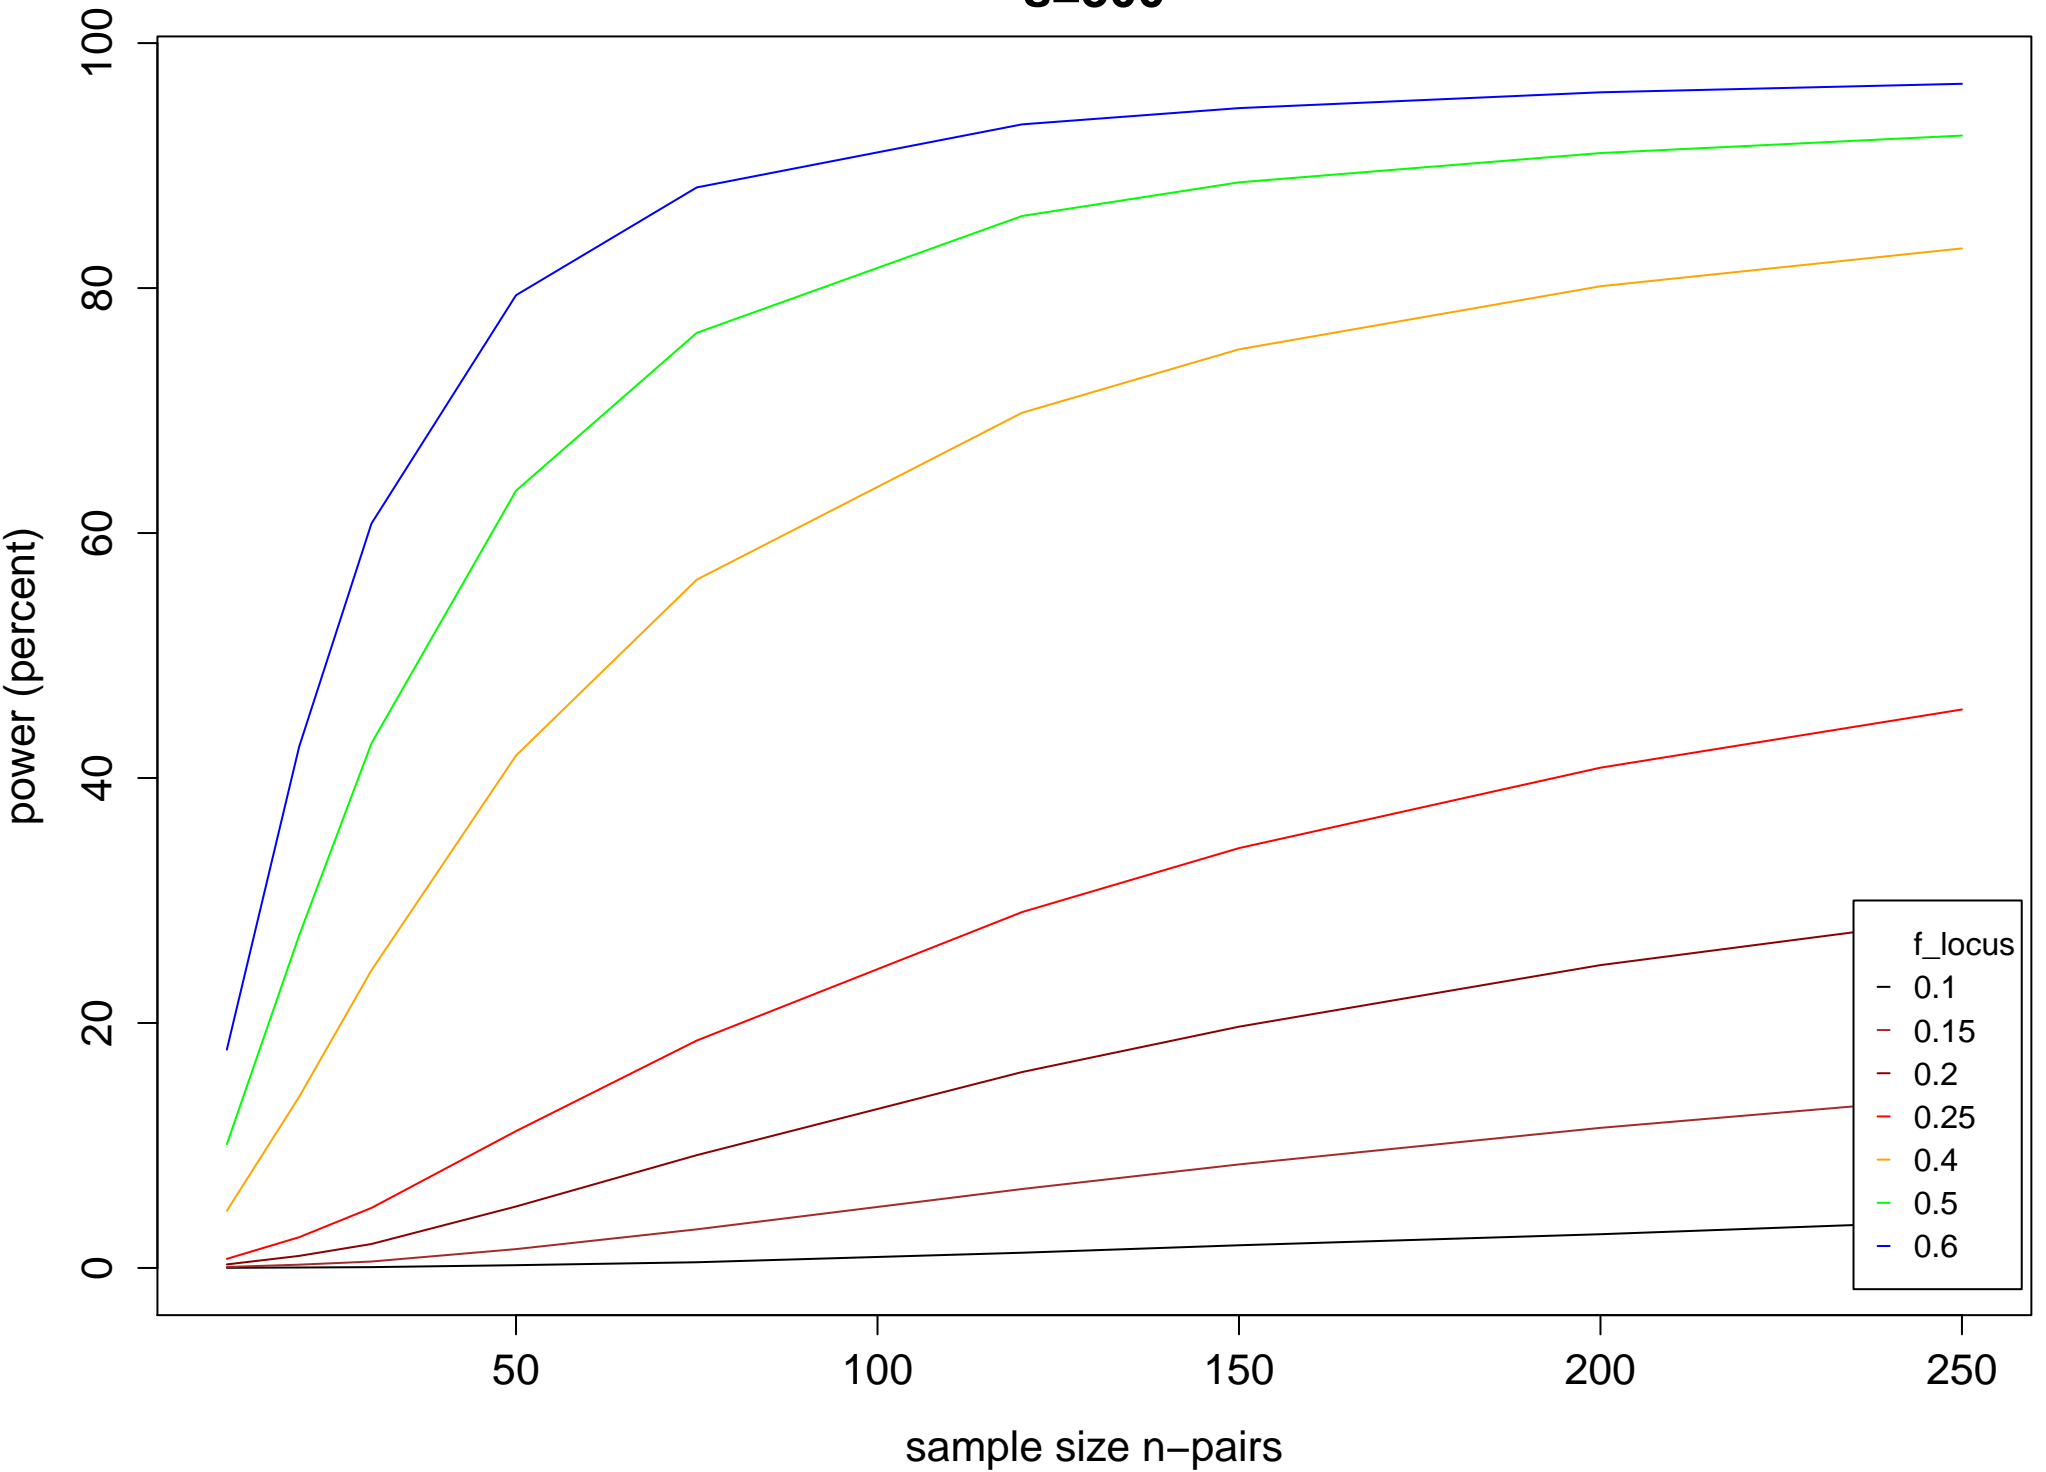

Supplement: 13073_2014_101_MOESM1_ESM.pdf [file 13073_2014_101_MOESM1_ESM.pdf]
